# Supplementary material for: Study on Ring-Opening Copolymerization of Trioxymethylene and Second Monomer Initiated by Phosphotungstic Acid
Source: Hindawi journal article supplement (doi:10.1155/2022/5094734), 2022-09-01
Supplement: f1 [file 5094734.f1.docx]

Supporting Information

1、The 1H-NMR spectra of the copolymer of TOX with D4 are shown in Figure S1.





Figure S1 1H-NMR spectra of the copolymer of TOX with D4;

2、IRC calculation of the copolymer of TOX with the second monomers are shown in Figure S2.


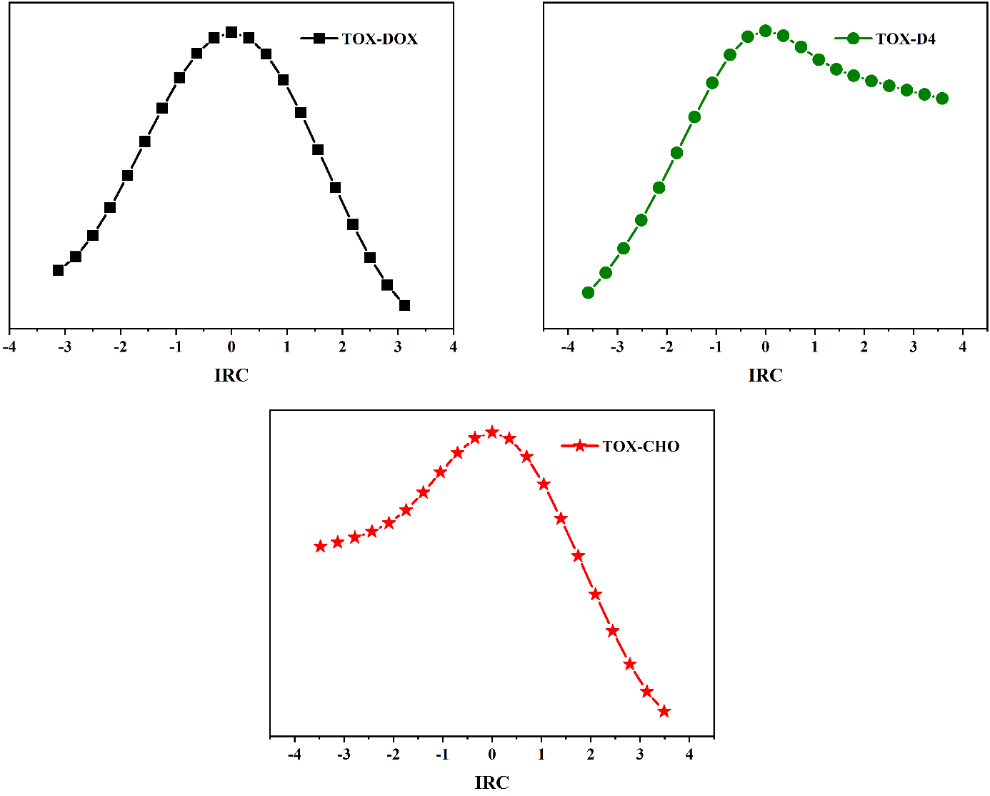


Figure S2 IRC calculation

3、Information about the coordinates of the reactants, transition states and products in the simulation is listed in this document.

1. TOX-DOX

1.1. the reactants:

C -1.47266 -0.6261 0.

O -0.63747 -1.70873 0.0948

C -0.44517 -2.43854 -1.12466

O 0.51462 -3.41194 -0.92165

C 1.79852 -2.88741 -0.58315

O 1.94314 -2.62338 0.77671

H -1.65661 -0.13295 0.94337

H -1.55081 -0.11034 -0.95038

H -1.37843 -2.93373 -1.40668

H -0.14516 -1.71744 -1.90641

H 2.52081 -3.66473 -0.83646

H 1.97741 -1.99083 -1.20284

H 1.23152 -2.00068 1.00703

C -4.46736 -3.64292 0.46666

C -3.52485 -2.4968 0.78372

C -4.77967 -2.13584 -1.12398

H -3.96709 -4.38874 -0.17216

H -4.91507 -4.1389 1.32963

H -2.49631 -2.80119 0.97958

H -3.89902 -1.88616 1.61645

H -5.38738 -1.25469 -1.35184

H -4.49862 -2.66058 -2.05218

O -5.49986 -2.97302 -0.26011

O -3.57273 -1.75385 -0.4455

1.2 transition states:

C -3.29505 0.81272 0.

O -4.26481 -0.14274 -0.10781

C -4.47549 -0.88641 1.11037

O -5.43495 -1.85356 0.89916

C -6.71897 -1.32934 0.56356

O -6.86355 -1.06586 -0.79609

H -3.15833 1.34952 -0.93255

H -3.28796 1.39545 0.91986

H -3.54128 -1.37844 1.38855

H -4.77718 -0.16426 1.89043

H -7.44089 -2.10708 0.81609

H -6.89766 -0.43314 1.18383

H -6.15885 -0.43734 -1.03049

C -0.47667 -2.04881 -0.45194

C -1.43828 -0.92235 -0.83117

C 0.05531 -0.63849 1.21839

H -0.97212 -2.77378 0.21228

H -0.05792 -2.57431 -1.31434

H -2.4003 -1.3465 -1.14467

H -1.01564 -0.34653 -1.67008

H 0.63574 0.25201 1.43984

H -0.40431 -1.1629 2.05741

O 0.59811 -1.40914 0.23537

O -1.60123 -0.10366 0.32051

1.3. the products

C -0.31746 -0.37919 0.

O 0.82236 -1.20251 0.11478

C 1.06517 -1.94819 -1.09526

O 2.02627 -2.91402 -0.87761

C 3.30941 -2.39123 -0.54405

O 3.45394 -2.12741 0.81562

H -0.34436 0.21114 0.92228

H -0.24256 0.27583 -0.87648

H 0.14798 -2.45824 -1.39809

H 1.37439 -1.22894 -1.87561

H 4.03086 -3.16989 -0.79558

H 3.48963 -1.49552 -1.16458

H 2.75359 -1.49389 1.04975

C -2.90154 -3.05861 0.43824

C -1.91873 -1.96908 0.8815

C -3.6138 -1.73644 -1.30066

H -2.4104 -3.78883 -0.22471

H -3.27946 -3.58631 1.31991

H -1.01765 -2.44503 1.28736

H -2.38946 -1.36984 1.67358

H -4.21072 -0.86024 -1.5134

H -3.011 -2.23018 -2.05937

O -4.01396 -2.46833 -0.2117

O -1.54887 -1.08784 -0.20312

2.TOX-D4

2.1. the reactants:

C -2.89242 0.18519 0.

O -3.77002 1.23248 0.04683

C -4.54876 1.43528 -1.1305

O -5.04264 2.7312 -1.13632

C -5.86719 3.04348 -0.01604

O -5.14284 3.40181 1.12083

H -3.11108 -0.63711 -0.6717

H -2.34866 0.03402 0.92053

H -3.91903 1.32279 -2.01767

H -5.366 0.69279 -1.13591

H -6.45527 3.91435 -0.30768

H -6.53216 2.18345 0.17342

H -4.57508 2.64013 1.33303

Si -0.18301 0.32944 -1.69952

O -1.2402 1.45274 -1.08497

Si -0.97627 3.14201 -1.23124

O 0.54127 3.80024 -1.56824

Si 2.05889 3.77299 -0.8679

O 1.98777 2.71906 0.4157

Si 1.8203 1.07793 0.59635

O 1.21179 0.43228 -0.80562

C -0.69995 -1.47134 -1.66526

C 0.16424 0.81467 -3.47524

C 0.62148 0.7776 2.00026

C 3.49835 0.30614 0.87392

C 3.27739 3.12921 -2.13596

C 2.54264 5.44471 -0.18263

C -1.50295 3.82214 0.41844

C -2.067 3.71936 -2.6297

H -0.89128 -1.84886 -0.65604

H -1.58003 -1.67366 -2.28527

H 0.1371 -2.04684 -2.07976

H 0.81692 0.08428 -3.96726

H -0.77197 0.86118 -4.04471

H 0.64439 1.79649 -3.54211

H -0.35535 1.20334 1.74905

H 0.4866 -0.29534 2.18164

H 0.96452 1.23937 2.93258

H 3.41622 -0.77816 1.01022

H 4.14947 0.48748 0.01142

H 3.98652 0.72537 1.76084

H 2.98343 2.12307 -2.45452

H 3.31851 3.76788 -3.02544

H 4.28818 3.06825 -1.71562

H 3.53097 5.38377 0.28772

H 2.58554 6.20944 -0.96597

H 1.82741 5.77486 0.57834

H -0.93285 3.37941 1.24177

H -1.34222 4.90588 0.44738

H -2.56724 3.63398 0.58588

H -1.91414 4.79119 -2.79813

H -1.85949 3.20057 -3.57176

H -3.11835 3.56713 -2.36568

2. 2. the transition states

C -3.92613 -0.73101 1.47021

O -2.97723 -1.66392 1.20749

C -3.08495 -2.89679 1.92906

O -3.93688 -3.82044 1.34375

C -5.33533 -3.60296 1.53836

O -5.92407 -2.79016 0.57777

H -4.59707 -0.74151 2.41643

H -4.61576 -0.47252 0.6637

H -2.0839 -3.32713 1.9066

H -3.39089 -2.66673 2.96389

H -5.8002 -4.58515 1.44411

H -5.4819 -3.21519 2.56217

H -5.55054 -1.89002 0.68112

Si -1.6369 1.27458 2.10435

O -2.96608 0.98907 1.44719

Si -4.90841 1.48037 1.28564

O -4.24477 2.77183 0.45041

Si -3.93781 4.36969 0.79598

O -3.50284 4.50356 2.39453

Si -2.17479 4.05539 3.29023

O -1.34499 2.87035 2.47191

C -1.69665 0.27661 3.68262

C -0.29849 0.7229 0.92035

C -2.80281 3.39537 4.92345

C -1.02511 5.5174 3.467

C -2.52906 4.91618 -0.30596

C -5.50092 5.36548 0.56023

C -5.88322 2.24291 2.92497

C -6.61008 1.66524 0.53688

H -2.51245 0.62622 4.32518

H -1.86544 -0.78593 3.47426

H -0.76003 0.36969 4.24375

H 0.69847 0.84921 1.35723

H -0.41809 -0.33154 0.64598

H -0.34406 1.31927 0.00229

H -3.43632 2.51796 4.75191

H -1.97587 3.09397 5.5767

H -3.39945 4.14533 5.45479

H -0.14818 5.26184 4.07245

H -0.66987 5.84533 2.48368

H -1.53343 6.36355 3.94284

H -1.63453 4.32146 -0.08984

H -2.77592 4.78402 -1.36536

H -2.2818 5.97164 -0.14383

H -5.32763 6.4292 0.75862

H -5.8809 5.26667 -0.46282

H -6.28186 5.0191 1.24638

H -4.85583 2.1749 3.2997

H -6.34142 3.14191 3.35306

H -6.43643 1.37156 3.293

H -7.10234 2.57816 0.89065

H -6.54295 1.72197 -0.55532

H -7.24844 0.8122 0.79303

2.3. the products

C -1.49912 -1.40212 0.

O -2.57225 -0.52049 0.18234

C -3.38677 -0.30367 -0.97867

O -3.87737 0.99395 -0.98093

C -4.70345 1.30973 0.13686

O -3.9809 1.66851 1.27409

H -1.83025 -2.32813 -0.48923

H -1.12256 -1.62343 1.00218

H -2.78843 -0.41872 -1.88528

H -4.20931 -1.03762 -0.95456

H -5.28918 2.18133 -0.15718

H -5.37109 0.45123 0.32565

H -3.39961 0.91621 1.48206

Si 0.90962 -1.43101 -1.51064

O -0.49927 -0.77278 -0.78129

Si 0.30107 1.52109 -1.11909

O 1.77111 2.28658 -1.44064

Si 3.2438 2.07916 -0.7141

O 3.13342 1.00083 0.55502

Si 2.96435 -0.63357 0.75026

O 2.3052 -1.28385 -0.62917

C 0.50496 -3.26381 -1.5405

C 1.24878 -0.88625 -3.27643

C 1.77831 -0.94372 2.16366

C 4.64113 -1.41777 1.01433

C 4.44419 1.39779 -1.97989

C 3.74713 3.72858 -0.00312

C -0.33966 2.10228 0.56015

C -0.91213 2.02223 -2.47625

H 0.33221 -3.66266 -0.53366

H -0.39064 -3.46858 -2.14088

H 1.3316 -3.83478 -1.97752

H 1.88045 -1.65249 -3.7464

H 0.32532 -0.81041 -3.86037

H 1.77179 0.07119 -3.33341

H 0.80172 -0.51056 1.92184

H 1.64334 -2.01829 2.33546

H 2.12308 -0.49054 3.09931

H 4.55724 -2.50127 1.15508

H 5.29242 -1.23891 0.15161

H 5.13078 -0.99609 1.89953

H 4.12734 0.39846 -2.29934

H 4.48991 2.03702 -2.86868

H 5.45708 1.31433 -1.56866

H 4.72932 3.69131 0.48107

H 3.7795 4.49214 -0.78844

H 3.01188 4.0478 0.74403

H 0.2084 1.65058 1.39322

H -0.2123 3.19021 0.63468

H -1.40455 1.88124 0.67039

H -0.81065 3.09806 -2.66968

H -0.72532 1.49794 -3.41901

H -1.94257 1.83547 -2.15935

3.TOX-CHO

3.1. the reactants:

C -2.96296 1.45503 0.

O -3.82356 0.39365 0.11453

C -3.88244 -0.28032 1.37306

O -3.71957 -1.6531 1.20992

C -4.69766 -2.25377 0.37048

O -4.4328 -2.09111 -0.99188

H -2.96542 1.90618 -0.98215

H -2.70916 2.01318 0.89271

H -3.07449 0.06107 2.02298

H -4.86876 -0.05627 1.80777

H -4.66134 -3.32387 0.57791

H -5.68799 -1.84923 0.64404

H -4.37397 -1.13051 -1.14024

C 1.2463 -1.05442 1.07441

C 0.7404 0.01894 0.12953

C -0.32221 -0.26043 -0.85863

C -0.89794 -1.64885 -1.01399

C 0.81251 -2.46891 0.65812

C -0.65645 -2.51945 0.22603

O -0.61788 0.43173 0.36172

H -0.42094 -2.1081 -1.89241

H -1.97054 -1.59082 -1.22393

H -0.37929 0.37778 -1.74354

H 1.41369 0.85635 -0.06192

H 2.33972 -1.0001 1.14085

H 0.8574 -0.81962 2.07384

H 1.44091 -2.80321 -0.18004

H 0.99659 -3.16635 1.48411

H -0.95202 -3.55123 0.00298

H -1.30533 -2.17522 1.0368

3.2. the transition states

C -0.45387 0.34226 0.

O 0.74882 -0.40073 -0.04322

C 1.0235 -1.05847 -1.28016

O 1.05745 -2.44488 -1.13406

C 2.10838 -2.89968 -0.29366

O 1.84047 -2.74649 1.0708

H -0.44213 0.8448 0.97273

H -0.48223 1.07277 -0.81578

H 0.24411 -0.83828 -2.01304

H 2.00085 -0.68682 -1.62263

H 2.20924 -3.9691 -0.48174

H 3.03649 -2.37599 -0.58352

H 1.63043 -1.80446 1.20214

C -3.77739 -1.82462 -0.93892

C -3.33608 -0.91443 0.1622

C -2.1593 -1.19874 0.93945

C -1.66406 -2.63229 1.03655

C -3.46001 -3.29673 -0.62413

C -1.99144 -3.4565 -0.21512

O -1.6712 -0.41762 -0.14826

H -2.16964 -3.07053 1.90912

H -0.5902 -2.65731 1.24115

H -2.05558 -0.64855 1.88456

H -3.83297 0.03748 0.30451

H -4.8506 -1.69627 -1.13461

H -3.26669 -1.56268 -1.88727

H -4.10693 -3.64091 0.19527

H -3.68354 -3.92426 -1.4959

H -1.75433 -4.50982 -0.02266

H -1.3395 -3.13519 -1.03433

3.3. the products

C -0.26455 -0.4321 0.

O -1.46543 -1.21513 0.09319

C -1.64872 -1.90963 1.32734

O -1.48893 -3.28673 1.1754

C -2.46094 -3.88321 0.32932

O -2.19505 -3.71761 -1.03367

H -0.32985 0.02716 -0.99245

H -0.30903 0.33398 0.78268

H -0.90669 -1.58751 2.06152

H -2.66804 -1.67574 1.66806

H -2.42716 -4.95426 0.53281

H -3.45282 -3.47955 0.59975

H -2.11882 -2.75702 -1.1761

C 3.48783 -2.69378 1.02453

C 3.16741 -1.71151 -0.05485

C 1.84465 -1.78355 -0.75671

C 1.35264 -3.22029 -1.01603

C 3.04884 -4.11433 0.63259

C 1.58158 -4.13858 0.19031

O 1.02042 -1.03014 0.22912

H 1.90581 -3.60656 -1.88456

H 0.29259 -3.21063 -1.28617

H 1.8541 -1.21169 -1.69598

H 3.66146 -0.74277 -0.05139

H 4.56084 -2.66722 1.25478

H 2.96916 -2.4033 1.95708

H 3.68362 -4.46555 -0.19331

H 3.21051 -4.80148 1.47192

H 1.27393 -5.16053 -0.06184

H 0.93467 -3.81133 1.01092
